# Supplementary material for: Inorganic salt-induced synthesis of lignin derived hierarchical porous carbon with self-embedded quantum dots and ultrahigh mesoporosity for supercapacitors
Source: Royal Society of Chemistry journal article supplement (doi:10.1039/d2nj01809h), 2022-01-01
Supplement: d2nj01809h1.pdf [file d2nj01809h1.pdf]

1  
2  
3  
4  
5  
6  
7  
8  
9  
10  
11  
12  
13  
14  
15  
16  
17  
18  
19

## ***Supporting Information***

### **Inorganic salt-induced synthesis of lignin derived hierarchical porous carbon with self-embedded quantum dots and ultrahigh mesoporosity for supercapacitors**

Lansheng Wei<sup>a, †</sup>, Zhengguo Wu<sup>a, †</sup>, Jiaming Li<sup>a</sup>, Yutong Xiong<sup>a</sup>, Xiaoying Wang<sup>a \*</sup>

<sup>a</sup> *State Key Laboratory of Pulp and Paper Engineering, School of Light Industry and Engineering, South China University of Technology, Guangzhou, 510640, China*

\* Corresponding author, E-mail: [xyw@scut.edu.cn](mailto:xyw@scut.edu.cn) (Xiaoying Wang).

ORCID ID: 0000-0002-9303-6509.

Tel:/Fax: +86-20-87111861.

† Authors with equal contributions to this work.

The supporting information included 10 pages, 3 Tables and 6 Figures.

20 **Table S1**

21 Textural properties and elemental analysis of LHPC-Li, LHPC-K and LHPC-Zn.

| Sample  | $S_{\text{BET}}$               | $V_t$                           | $V_{\text{mic}}$                | $V_{\text{mes}}$                | $V_{\text{mic}}/V_t$ | $V_{\text{mes}}/V_t$ | C     | O     | S     |
|---------|--------------------------------|---------------------------------|---------------------------------|---------------------------------|----------------------|----------------------|-------|-------|-------|
|         | ( $\text{m}^2 \text{g}^{-1}$ ) | ( $\text{cm}^3 \text{g}^{-1}$ ) | ( $\text{cm}^3 \text{g}^{-1}$ ) | ( $\text{cm}^3 \text{g}^{-1}$ ) | (%)                  | (%)                  | (wt%) | (wt%) | (wt%) |
| LHPC-Li | 902.8                          | 0.8632                          | 0.0586                          | 0.4046                          | 12.65                | 87.35                | 73.02 | 25.91 | 0.86  |
| LHPC-K  | 904.3                          | 0.8741                          | 0.0563                          | 0.2178                          | 20.54                | 79.46                | 74.59 | 24.17 | 0.54  |
| LHPC-Zn | 933.6                          | 1.016                           | 0.1197                          | 0.8965                          | 10.72                | 88.23                | 71.95 | 22.89 | 4.74  |

22  $S_{\text{BET}}$  is the specific surface area obtained from multipoint Brunauer-Emmett-Teller

23 (BET) plots.

24  $V_t$  is the total pore volume determined at  $P/P_0 = 0.99$ .

25  $V_{\text{mic}}$  and  $V_{\text{mes}}$  are the micropore and mesopore volume calculated by the t-plot method.

26

27

28 **Table S2**

29 The Inorganic element content of LHPC-K-Zn measured by inductively coupled  
30 plasma emission spectrometer (ICP-OES).

| Element species (%) | Content (%) |
|---------------------|-------------|
| K                   | 0.0537      |
| Zn                  | 0.018       |
| Cl                  | 0.12        |

31

32

33 **Table S3**

34 Relative concentrations of element species in LHPC, LHPC-Li-Zn and LHPC-K-Zn

35 by fitting XPS spectra.

| Sample        | LHPC        | LHPC-Li-Zn | LHPC-K-Zn |
|---------------|-------------|------------|-----------|
| O species (%) | Content (%) |            |           |
| C=O           | 20.08       | 14.86      | 16.25     |
| C-OH          | 35.61       | 32.63      | 26.59     |
| C-O-C         | 26.48       | 28.66      | 33.50     |
| O=C-OH        | 17.83       | 23.74      | 23.66     |

36

37

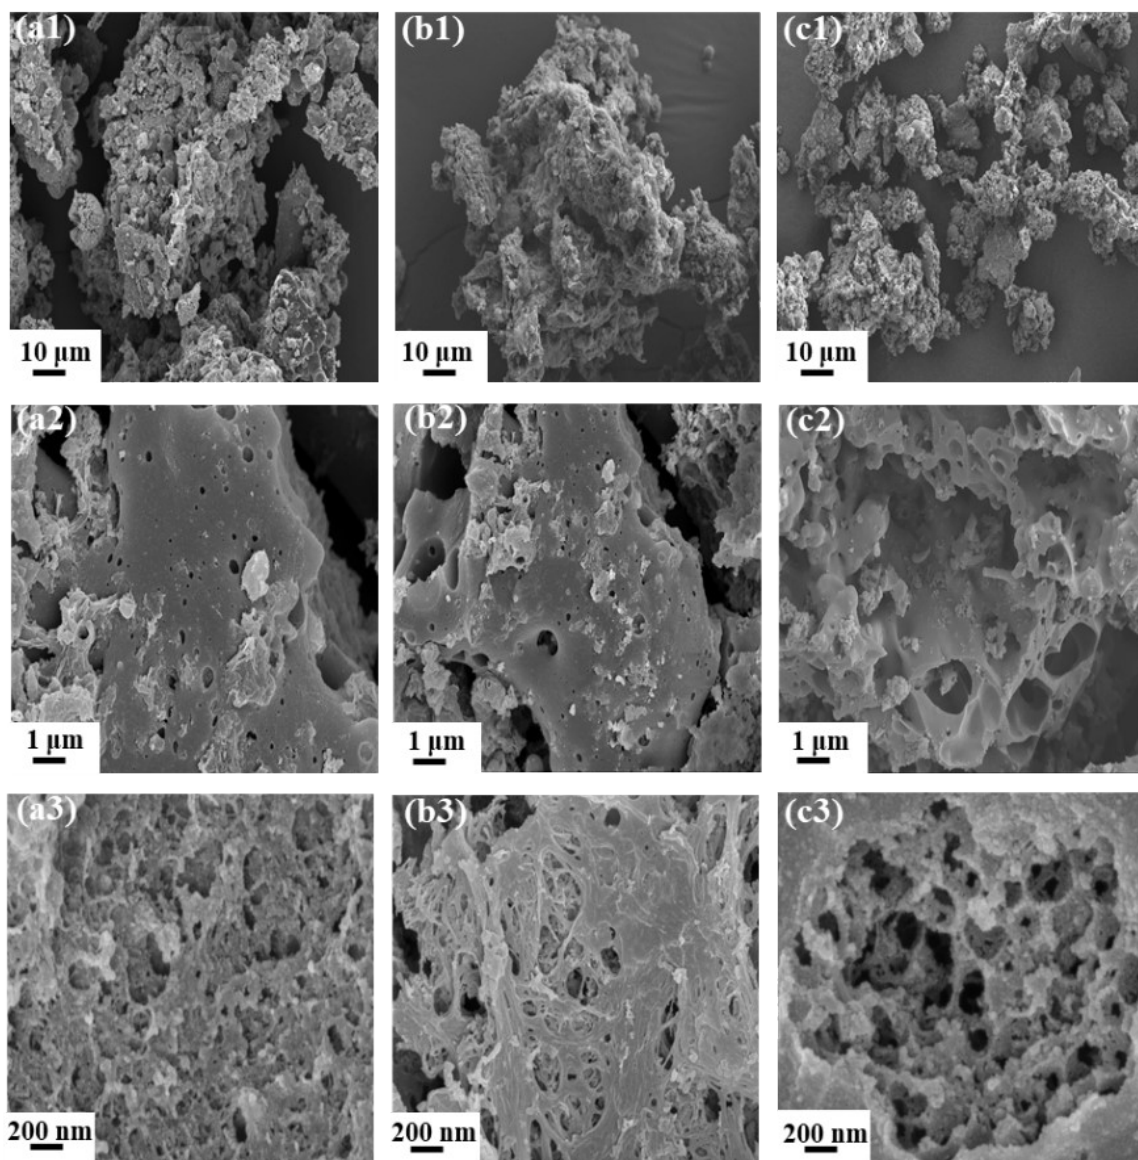

39

40 **Fig. S1** SEM images of LHC-Li (a1), LHPC-Li (a2, a3), LHC-K (b1), LHPC-K (b2,

41

b3), LHC-Zn (c1) and LHPC-Zn (c2, c3)

42

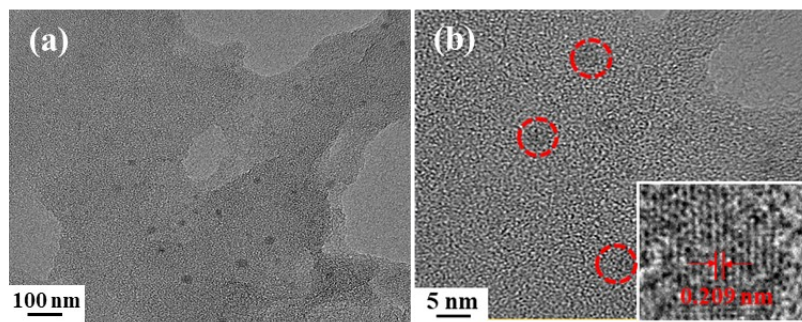

43

44

45

**Fig. S2** TEM images of LHPC-K-Zn

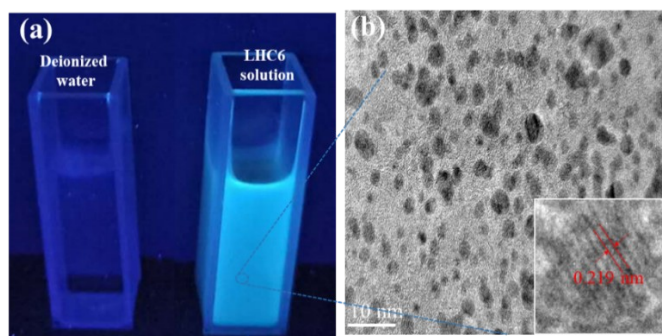

46

47

**Fig. S3** (a) The optical image and (b) TEM image of LHC-K-Zn solution

48

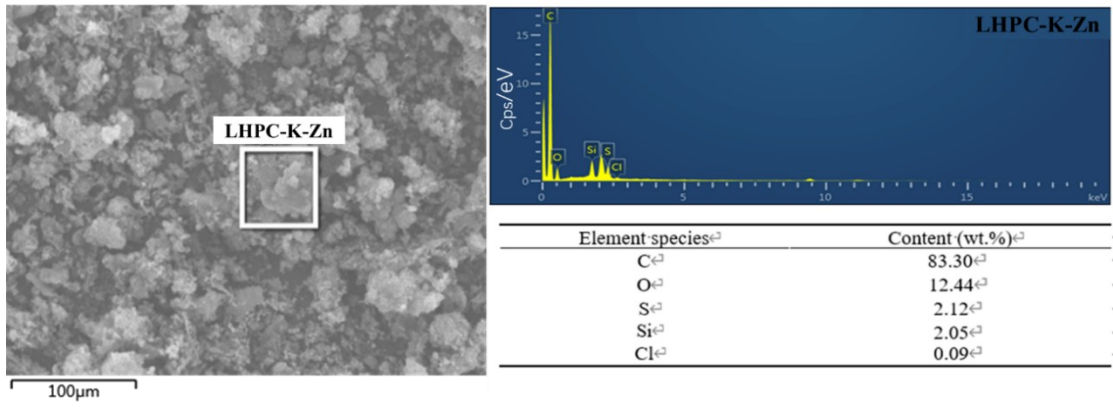

49

50

**Fig. S4** The energy-dispersive spectroscopy of LHPK-K-Zn

51



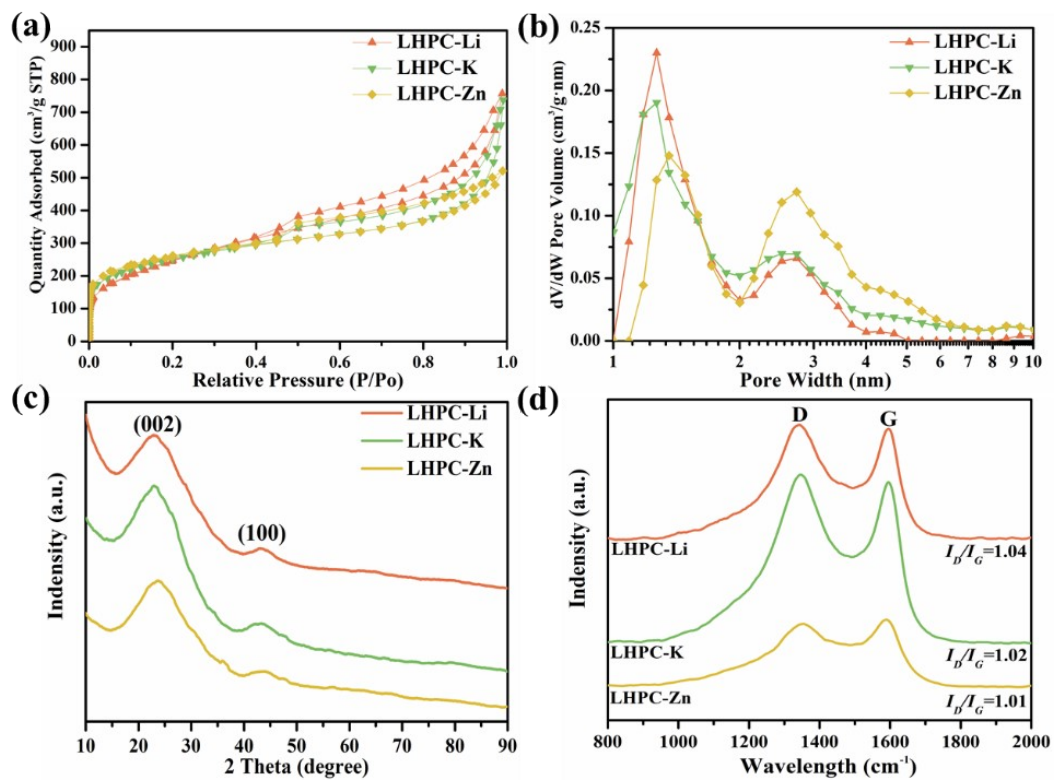

52

53 **Fig. S5** N<sub>2</sub> adsorption-desorption isotherms (a), pore size distributions (b), wide-angle  
 54 X-ray diffraction (XRD) patterns (c) and Raman spectra (d) of the LHPC-Li, LHPC-K  
 55 and LHPC-Zn.

56

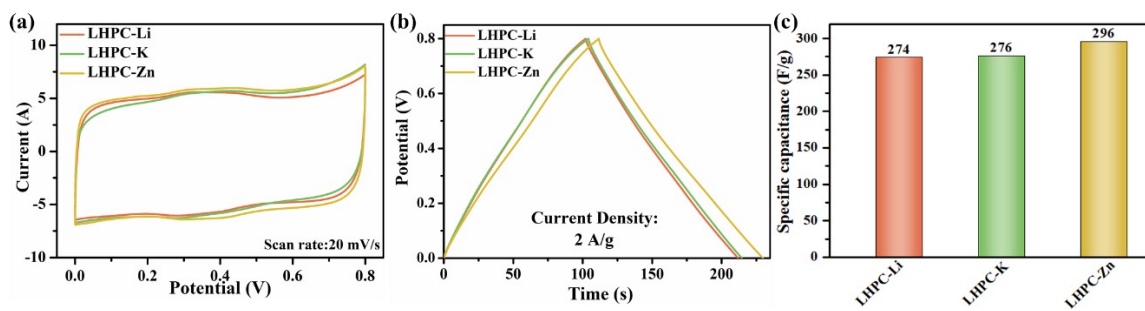

57

58 **Fig. S6** CV curves (a), GCD plots (b), and specific capacitances (c) of the LHPC-Li,

59

LHPC-K and LHPC-Zn in three-system
